# Supplementary material for: Germanium Nanoparticles Prepared by Laser Ablation in Low Pressure Helium and Nitrogen Atmosphere for Biophotonic Applications
Source: MDPI journal article supplement (doi:10.3390/ma15155308), 2022-08-02
Supplement: s1 [file s1]

## Supplementary Materials

# Germanium Nanoparticles Prepared by Laser Ablation in Low Pressure Helium and Nitrogen Atmosphere for Biomedical Applications

Anastasiya A. Fronya<sup>1,2</sup>, Sergey V. Antonenko<sup>1,3</sup>, Nikita V. Karpov<sup>1</sup>, Nikolay S. Pokryshkin<sup>1,4</sup>, Anna S. Eremina<sup>1</sup>, Valery G. Yakunin<sup>4</sup>, Alexander Yu. Kharin<sup>1</sup>, Alexander V. Syuy<sup>5</sup>, Valentin S. Volkov<sup>5</sup>, Yaroslava Dombrovska<sup>1</sup>, Alexander A. Garmash<sup>1</sup>, Nikolay I. Kargin<sup>3</sup>, Sergey M. Klimentov<sup>1</sup>, Victor Yu. Timoshenko<sup>1,2,4</sup>, Andrei V. Kabashin<sup>6</sup>

- <sup>1</sup> MEPHI, Institute of Engineering Physics for Biomedicine (PhysBio), Kashirskoe sh. 31, 115409 Russia; AAFronya@mephi.ru (A.A.F.); black.beast\_1995@list.ru (N.S.P.); annaeremina96@mail.ru (A.S.E.); AYKharin@mephi.ru (A.Y.K.); NVKarpov@mephi.ru (N.V.K.); yaroslava.dombrovska@gmail.com (Y.D.); SSGarmash@mephi.ru (A.A.G.); SMKlimentov@mephi.ru (S.M.K.); vtimoshe@gmail.com (V.Y.T.)
- <sup>2</sup> Lebedev Physical Institute of the Russian Acad. Sci., Leninskiy Pr. 53, 119991 Moscow, Russia; nastya708@yandex.ru (F.A.A.); timoshenkovy@lebedev.ru (V.Y.T.)
- <sup>3</sup> MEPHI, Institute of Nanoengineering in Electronics, Spintronics and Photonics, Kashirskoe sh. 31, 115409 Moscow, Russia; SVAntonenko@mephi.ru (S.V.A.); NIKargin@mephi.ru (N.I.K.)
- <sup>4</sup> Lomonosov Moscow State University, Faculty of Physics, Leninskie Gory 1, 119991 Moscow, Russia; black.beast\_1995@list.ru (N.S.P.); yvg51@bk.ru (Y.V.G.); timoshen@physics.msu.ru (V.Y.T.)
- <sup>5</sup> Moscow Institute of Physics and Technology (MIPT), Center for Photonics and 2D Materials, 141700 Dolgoprudny, Russia; alsyuy271@gmail.com (A.V.S.); vsv.mipt@gmail.com (V.S.V.)
- <sup>6</sup> Aix Marseille Univ, CNRS, LP3, Campus de Luminy, Case 917, 13288 Marseille, France; andrei.kabashin@univ-amu.fr (A.V.K.)

### 1. SEM and EDX

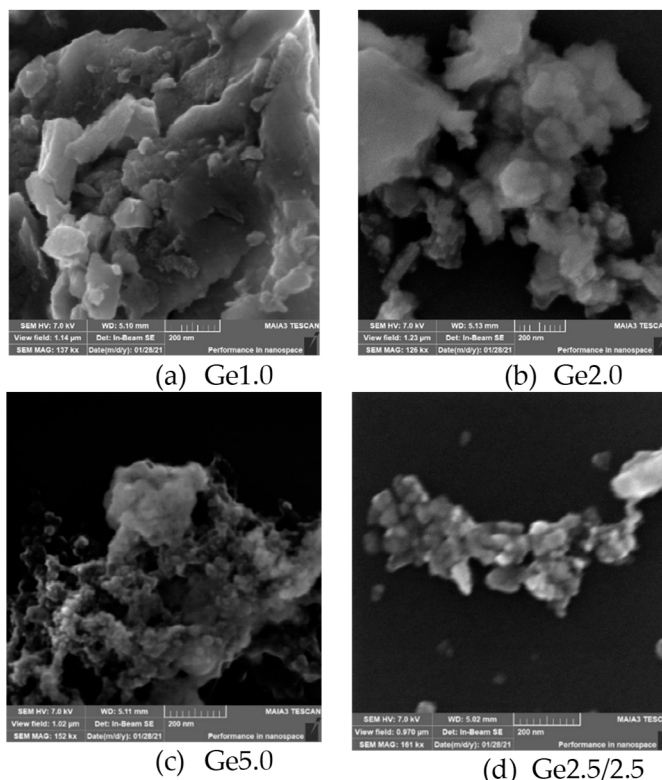

Figure S1. SEM images of selected regions of the PLD-deposited Ge films prepared at different gas mixtures.

(a)

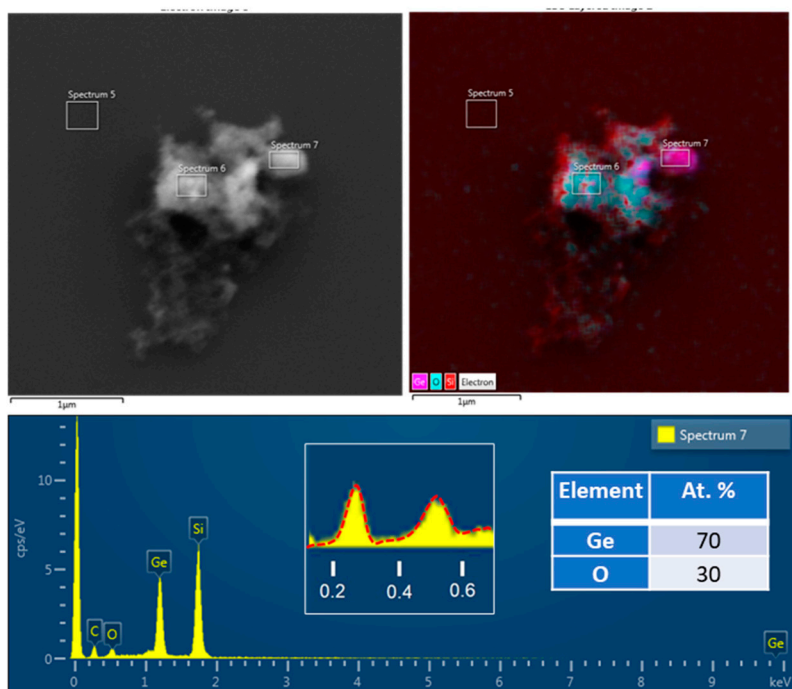

(b)

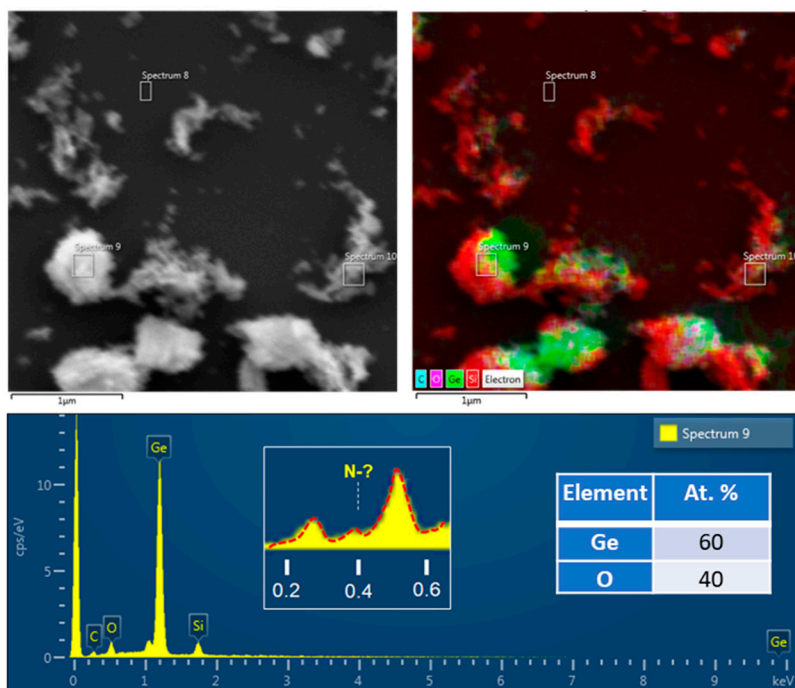

Figure S2. EDX elemental analysis of (a) Ge5.0 and (b) Ge2.5/2.5 films.

## 2. Raman and PL spectra

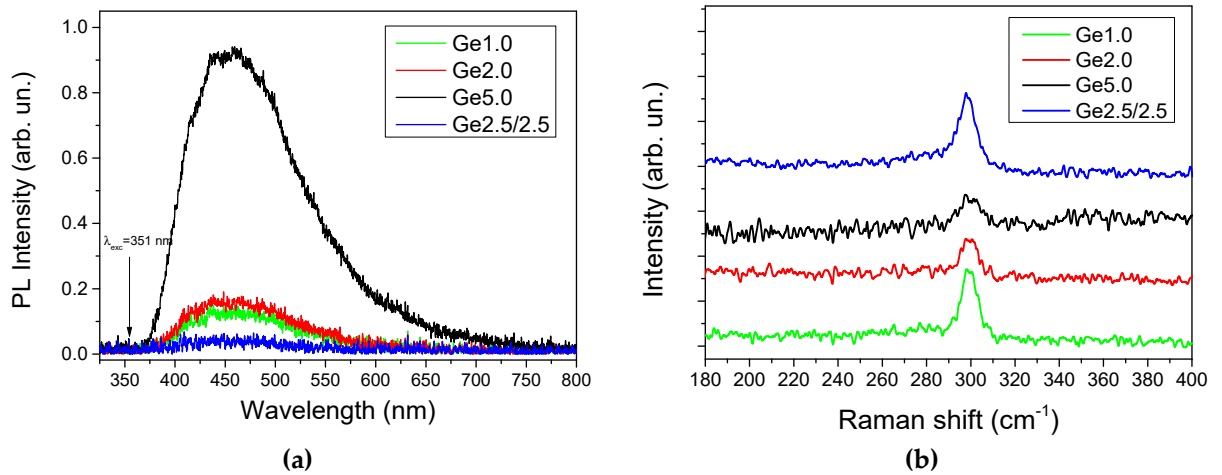

Figure S3. (a) Raman spectra of PLD-deposited Ge films on c-Si substrate under excitation at 632.8 nm; (b) PL spectra of the same films under laser excitation at 351 nm.

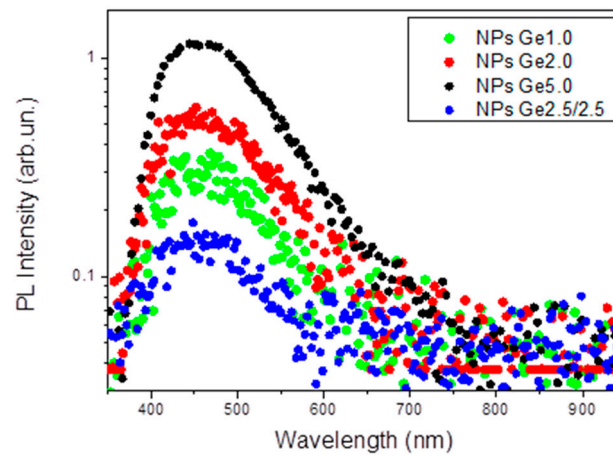

Figure S4. PL spectra of dried suspensions of Ge NPs under laser excitation at 351 nm.
